# Supplementary material for: Absolute nucleosome occupancy map for the Saccharomyces cerevisiae genome
Source: HighWire-hosted journal article supplement (doi:10.1101/gr.253419.119), 2019-11-06
Supplement: Supplemental_Table_1.xlsx [file Supplemental_Table_1.xlsx]

## Sheet: Table1
Supplementary Table 1. Properties of maps using different enzymes. Mean absolute occupancies and mean (over sites) occupancy standard deviations over replicates for all used enzymes, either alone or combined to one map as indicated. Column 5 contains the number of methylation or restriction enzyme sites.
map name	mean abs. occ. / %	mean st. dev. / %	replicates	sites
ORE-seq + ODM-seq	77.6	6.0	17	1348985
ORE-seq (AluI + BamHI + HindIII)	71.5	5.4	12	13807
ODM-seq (CpG + GpC)	77.7	6.0	5	1345945
AluI	70.3	5.3	3	9603
BamHI	77.2	5.8	7	1547
HindIII	72.6	4.9	2	3757
CpG	73.9	6.6	3	661758
GpC	80.7	5.4	2	807851
qDA-seq (AluI (Chereji 2019, not arrested, max units))	75.9	3.0	2	38315
qDA-seq (AluI (Chereji 2019, arrested, max units))	75.2	2.4	2	38314
