# Supplementary material for: Absolute nucleosome occupancy map for the Saccharomyces cerevisiae genome
Source: HighWire-hosted journal article supplement (doi:10.1101/gr.253419.119), 2019-11-06
Supplement: Supplemental_Table_2_.xlsx [file Supplemental_Table_2_.xlsx]

## Sheet: Tabelle1
Supplementary Table 2. All used datasets and their GEO accession numbers. Different yeast strain backgrounds are mentioned in column G.
Method	IP	Study	Access	GEO Number	Comment	Strain
ODM-seq		this study	GSE132225			BY4741
ORE-seq		this study	GSE132225			BY4741
Nucleosome Mapping
MNase-seq	-	this study	GSE132225			BY4741
MNase-ChIP-seq	H4	Zhang et al. 2011, Science	SRP005985	SRR124142		BY4741
H3Q85C chemical cleavage mapping	-	Chereij et al. 2018, Mol.Cell	GSE97290	GSM2561057-59	dyads extended to 147 bp	W303
MNase-ChIP-seq	H3	True et al. 2016, JBC	GSE80234	GSM2122539-40		S288C-YPH499
Sonication-ChIP-seq	H3	Joo et al. 2017, Genes Dev.	GSE94851	GSM2486488		BY4741
DNA Accessibility
qDA-seq		Chereji et al. 2019b, GenomeRes.	GSE120956	GSM3422022, GSM3422044	not arrested	YDC111
qDA-seq		Chereji et al. 2019b, GenomeRes.	GSE115692	GSM3187798, GSM3187809	arrested	YDC111
ATAC-seq		Dronamraju et al. 2018, Mol.Cell	GSE111815	GSM3040130-32		S288C
RSC
CUT&RUN	Sth1	Brahma & Henikoff 2019, Mol.Cell	GSE116853	GSM3262849-50		W303
MNase-ChIP-seq	Sth1	Parnell et al. 2015, Elife	GSE65592	GSM1600616		S288C-YBC601 p3018
ChEC-seq	Rsc8	Kubik et al. 2018, Mol.Cell	GSE98259	GSM2589932		W303-YSK418
Transcription
NET-seq	-	Churchman & Weissman 2011, Nature	GSE25107	GSM617027		BY4741
4sU-seq	-	Xu et al. 2017, Nature Com.	supplied by Björn Schwalb		PMID: 28585565	BY4741
GRFs
SLIM-ChIP-seq	Abf1	Gutin et al. 2018, Cell Reports	GSE108948	GSM2916412		BY4741
SLIM-ChIP-seq	Reb1	Gutin et al. 2018, Cell Reports	GSE108948	GSM2916407		BY4741
SLIM-ChIP-seq	Rap1	Gutin et al. 2018, Cell Reports	GSE108948	GSM2916413		BY4741
PWMs		http://stormo.wustl.edu/ScerTF/
