# Supplementary material for: Absolute nucleosome occupancy map for the Saccharomyces cerevisiae genome
Source: HighWire-hosted journal article supplement (doi:10.1101/gr.253419.119), 2019-11-06
Supplement: Supplemental_Table_3.xlsx [file Supplemental_Table_3.xlsx]

## Sheet: RE_results_paper
Supplementary Table 3. All ORE-seq samples generated in this study. Corresponding mean occupancies for all three ORE-seq methods described in the Supplements are found in column 4-6. Window around cut site, which was used to count ending cut sites, is indicated in column 2, and mean resection around cut site in column 3. In column 7, we calculated the mean effective coverage per cut site.
sample	counting window around cut site	mean resection length	mean occ. (cut-uncut m., not corrected)	mean occ. (cut-all cut m., not corrected)	mean occ. (cut-uncut m., corrected)	mean effective coverage per site
calibration_AluI_10_pct_cut_30min	0	0	0.841	0.889	0.89	207
calibration_AluI_100_pct_cut_30min	0	0	0.0165	0.027	0.0242	197
calibration_AluI_30_pct_cut_30min	0	0	0.603	0.69	0.699	225
calibration_AluI_50_pct_cut_30min	0	0	0.398	0.501	0.502	248
calibration_AluI_70_pct_cut_30min	0	0	0.218	0.291	0.298	215
calibration_AluI_90_pct_cut_30min	0	0	0.0743	0.0983	0.109	261
calibration_BamHI-HF_10_pct_cut_30min	0	0	0.841	0.901	0.899	203
calibration_BamHI-HF_100_pct_cut_30min	0	0	0.0103	0.091	0.0172	143
calibration_BamHI-HF_30_pct_cut_30min	0	0	0.574	0.719	0.691	70.2
calibration_BamHI-HF_50_pct_cut_30min	0	0	0.376	0.501	0.502	164
calibration_BamHI-HF_70_pct_cut_30min	0	0	0.203	0.314	0.3	177
calibration_BamHI-HF_90_pct_cut_30min	0	0	0.069	0.0997	0.111	195
calibration_HindIII_10_pct_cut_30min	0	0	0.846	0.901	0.901	174
calibration_HindIII_100_pct_cut_30min	0	0	0.00778	-0.0272	0.0128	191
calibration_HindIII_30_pct_cut_30min	0	0	0.581	0.688	0.697	148
calibration_HindIII_50_pct_cut_30min	0	0	0.368	0.468	0.491	163
calibration_HindIII_70_pct_cut_30min	0	0	0.214	0.297	0.312	165
calibration_HindIII_90_pct_cut_30min	0	0	0.0636	0.0582	0.101	155
in_vitro_chromatin_high_dens_BamHI-HF_20U_30min	0	0	0.644	0.753	0.747	84.4
in_vitro_chromatin_high_dens_BamHI-HF_80U_120min_20U_at_1h	0	0	0.604	0.698	0.712	103
in_vitro_chromatin_high_dens_BamHI-HF_80U_30min	0	0	0.579	0.737	0.689	43.7
in_vitro_chromatin_low_dens_BamHI-HF_20U_30min	0	0	0.311	0.42	0.425	99.7
in_vitro_chromatin_low_dens_BamHI-HF_80U_120min_20U_at_1h	0	0	0.299	0.418	0.411	56.6
in_vitro_chromatin_low_dens_BamHI-HF_80U_30min	0	0	0.296	0.422	0.408	68.1
WT1_BamHI-HF_0U_30min	5		0.997		0.998	200
WT1_BamHI-HF_100U_30min	24	5.71	0.758		0.833	181
WT1_BamHI-HF_400U_30min	25	5.46	0.691		0.781	211
WT1_BamHI-HF_800U_120min_200U_at_1h	44	9.9	0.666	0.675	0.759	200
WT1_BamHI-HF_800U_30min	33	7.14	0.706	0.718	0.792	221
WT1_xl_AluI_0U_30min	5		0.977	0.996	0.985	239
WT1_xl_AluI_100U_30min	1	0.019	0.84	0.893	0.883	175
WT1_xl_AluI_400U_30min	1	0.0163	0.81	0.845	0.859	214
WT1_xl_BamHI-HF_0U_30min	5		0.981	0.998	0.989	109
WT1_xl_BamHI-HF_200U_30min	7	0.413	0.814	0.906	0.872	109
WT1_xl_BamHI-HF_800U_120min_200U_at_1h	9	1.63	0.821	0.842	0.876	60
WT1_xl_BamHI-HF_800U_30min_rep1	6	0.288	0.787	0.883	0.852	94.8
WT1_xl_BamHI-HF_800U_30min_rep2	6	0.309	0.851	0.869	0.898	67.4
WT1_xl_HindIII_0U_30min	5		0.997	1	0.998	260
WT1_xl_HindIII_1000U_30min	8	0.713	0.809	0.856	0.864	250
WT1_xl_HindIII_4000U_30min	7	0.541	0.792	0.844	0.851	239
WT2_AluI_0U_30min	5		0.996	0.835	0.997	264
WT2_AluI_100U_30min	10	1.03	0.659		0.738	192
WT2_AluI_300U_30min	10	1.02	0.653		0.733	71.8
WT2_BamHI-HF_0U_30min_rep1	5		0.997	0.998	0.998	363
WT2_BamHI-HF_0U_30min_rep2	5		0.997	0.994	0.998	94.7
WT2_BamHI-HF_100U_30min_rep1	16	4.08	0.771	0.717	0.842	220
WT2_BamHI-HF_100U_30min_rep2	18	4.38	0.74	0.86	0.811	45.5
WT2_BamHI-HF_400U_30min_rep1	17	4.2	0.712	0.645	0.796	241
WT2_BamHI-HF_400U_30min_rep2	18	4.23	0.672	0.769	0.761	89.9
WT3_AluI_0U_30min	5		0.99	0.997	0.993	297
WT3_AluI_100U_30min	10	1.02	0.661	0.741	0.737	234
WT3_AluI_400U_30min	11	1.08	0.631	0.715	0.711	225
WT3_BamHI-HF_0U_30min	5		0.988	0.995	0.992	197
WT3_BamHI-HF_200U_30min	23	5.48	0.751	0.808	0.825	196
WT3_BamHI-HF_800U_120min_200U_at_1h	35	8.08	0.66	0.639	0.751	216
WT3_BamHI-HF_800U_30min_rep1	22	4.99	0.666	0.758	0.757	175
WT3_BamHI-HF_800U_30min_rep2	29	6.57	0.705	0.724	0.79	294
WT3_HindIII_0U_30min	5		0.99	1	0.994	136
WT3_HindIII_4000U_30min	15	3.05	0.663	0.766	0.75	124
WT3_HindIII_400U_30min	12	2.91	0.735	0.817	0.808	161
WT4_AluI_100U_30min	21	2.01	0.643	0.716	0.725	169
WT4_AluI_400U_30min	19	1.79	0.595	0.646	0.683	164
WT4_BamHI-HF_200U_30min	28	6.58	0.702	0.79	0.791	148
WT4_BamHI-HF_800U_30min	28	6.06	0.63	0.728	0.733	250
WT4_HindIII_0U_30min	5		0.997	1	0.998	252
WT4_HindIII_1000U_30min	25	4.27	0.659	0.774	0.751	213
WT4_HindIII_4000U_30min	26	4.62	0.609	0.718	0.709	277
WT4_xl_AluI_0U_30min	5		0.988	0.996	0.992	278
WT4_xl_AluI_100U_30min	1	0.0143	0.88	0.909	0.914	242
WT4_xl_AluI_400U_30min	1	0.0117	0.851	0.883	0.893	233
WT4_xl_BamHI-HF_0U_30min	5		0.987	1	0.992	145
WT4_xl_BamHI-HF_200U_30min	7	0.206	0.866	0.911	0.911	149
WT4_xl_BamHI-HF_800U_120min_200U_at_1h	6	0.704	0.828	0.823	0.883	166
WT4_xl_BamHI-HF_800U_30min_rep1	5	0.148	0.847		0.898	150
WT4_xl_BamHI-HF_800U_30min_rep2	5	0.169	0.872	0.874	0.915	135
WT4_xl_HindIII_0U_30min	5		0.996	1	0.997	268
WT4_xl_HindIII_1000U_30min	4	0.121	0.834	0.87	0.884	245
WT4_xl_HindIII_4000U_30min	3	0.0815	0.824	0.859	0.877	318
