# Supplementary material for: Absolute nucleosome occupancy map for the Saccharomyces cerevisiae genome
Source: HighWire-hosted journal article supplement (doi:10.1101/gr.253419.119), 2019-11-06
Supplement: Supplemental_Table_4.xlsx [file Supplemental_Table_4.xlsx]

## Sheet: Tabelle1
Supplementary Table 4. All ODM-seq samples generated in this study. The number of PCR cycles applied after bisulfite conversion are indicated in column 2. The spike-ins present in the samples are found in column 3. Mean occupancies of ex vivo chromatin and the corresponding in vitro 25mer-601 spike-in are found in column 4-7.
sample	PCR cycles	spike-ins	mean occ.	mean occ. (Widom-601 sequence from spike-in)	mean occ. (linker sequence from spike-in)	mean occ. (backbone sequence from spike-in)	mean coverage per site
WT1_xl_CpG_2U_150min_refill_at_90min_MgCl2	12	25mer 601 array plasmid, E. coli genome SGD	0.866	0.958	0.639	0.76	36
WT1_xl_CpG_2U_180min	14	25mer 601 array plasmid, E. coli genome SGD	0.701	0.903	0.0818	0.486	39.2
WT1_xl_CpG_2U_240min_refill_at_180min	14	25mer 601 array plasmid, E. coli genome SGD	0.677	0.844	0.0717	0.467	45.6
WT1_xl_CpG_2U_45min	14	25mer 601 array plasmid, E. coli genome SGD	0.742	0.908	0.0531	0.497	36.2
WT1_xl_CpG_2U_45min_MgCl2	12	25mer 601 array plasmid, E. coli genome SGD	0.915	0.994	0.981	0.986	42.6
WT1_xl_CpG_1U_45min_MgCl2	12	25mer 601 array plasmid, E. coli genome SGD	0.96	0.994	0.99	0.992	55.4
WT1_xl_CpG_2U_90min	14	25mer 601 array plasmid, E. coli genome SGD	0.717	0.89	0.0573	0.466	45.8
WT1_xl_GpC_2U_150min_refill_at_90min_MgCl2	12	25mer 601 array plasmid, E. coli genome SGD	0.933	0.989	0.748	0.638	40.2
WT1_xl_GpC_2U_180min	14	25mer 601 array plasmid, E. coli genome SGD	0.811	0.977	0.0647	0.572	33.9
WT1_xl_GpC_2U_240min_refill_at_180min	14	25mer 601 array plasmid, E. coli genome SGD	0.787	0.975	0.06	0.574	44.9
WT1_xl_GpC_2U_45min	14	25mer 601 array plasmid, E. coli genome SGD	0.866	0.975	0.07	0.585	92.2
WT1_xl_GpC_1U_45min_MgCl2	14	25mer 601 array plasmid, E. coli genome SGD	0.976	0.991	0.977	0.948	24.7
WT1_xl_GpC_2U_90min	14	25mer 601 array plasmid, E. coli genome SGD	0.832	0.972	0.0671	0.564	66.4
WT1_CpG_2U_150min_refill_at_90min_MgCl2	12	25mer 601 array plasmid, E. coli genome SGD	0.793	0.984	0.715	0.869	44.4
WT1_CpG_2U_45min_MgCl2	12	25mer 601 array plasmid, E. coli genome SGD	0.774	0.991	0.948	0.96	46
WT1_CpG_1U_45min_MgCl2	12	25mer 601 array plasmid, E. coli genome SGD	0.871	0.993	0.976	0.982	67
WT1_GpC_2U_150min_refill_at_90min_MgCl2	12	25mer 601 array plasmid, E. coli genome SGD	0.892	0.993	0.811	0.901	39.1
WT1_GpC_2U_45min_MgCl2	12	25mer 601 array plasmid, E. coli genome SGD	0.847	0.993	0.922	0.863	39.5
WT1_GpC_1U_45min_MgCl2	12	25mer 601 array plasmid, E. coli genome SGD	0.923	0.995	0.969	0.943	37.3
WT3_CpG_2U_150min_refill_at_90min_MgCl2	12	25mer 601 array plasmid, E. coli genome SGD	0.747	0.976	0.615	0.8	38.9
WT3_CpG_2U_15min	12	25mer 601 array plasmid, E. coli genome SGD	0.63	0.971	0.0562	0.587	49.3
WT3_CpG_2U_180min	12	25mer 601 array plasmid, E. coli genome SGD	0.521	0.967	0.0484	0.541	28.7
WT3_CpG_2U_240min_refill_at_180min	12	25mer 601 array plasmid, E. coli genome SGD	0.494	0.956	0.0531	0.506	41.3
WT3_CpG_2U_45min	14	25mer 601 array plasmid, E. coli genome SGD	0.609	0.976	0.0521	0.573	33.6
WT3_CpG_2U_45min_MgCl2	12	25mer 601 array plasmid, E. coli genome SGD	0.755	0.99	0.923	0.952	34.1
WT3_CpG_1U_45min_MgCl2	12	25mer 601 array plasmid, E. coli genome SGD	0.84	0.993	0.964	0.977	59.6
WT3_CpG_2U_90min	12	25mer 601 array plasmid, E. coli genome SGD	0.563	0.972	0.0472	0.538	40.8
WT3_GpC_2U_150min_refill_at_90min_MgCl2	12	25mer 601 array plasmid, E. coli genome SGD	0.858	0.992	0.791	0.862	23.3
WT3_GpC_2U_15min	14	25mer 601 array plasmid, E. coli genome SGD	0.72	0.984	0.362	0.697	45.5
WT3_GpC_2U_240min_refill_at_180min	14	25mer 601 array plasmid, E. coli genome SGD	0.621	0.979	0.212	0.644	39.9
WT3_GpC_2U_180min	13	25mer 601 array plasmid, E. coli genome SGD	0.595	0.978	0.219	0.617	39.1
WT3_GpC_2U_45min	14	25mer 601 array plasmid, E. coli genome SGD	0.654	0.98	0.272	0.639	44
WT3_GpC_2U_45min_MgCl2	14	25mer 601 array plasmid, E. coli genome SGD	0.823	0.988	0.939	0.868	22.7
WT3_GpC_1U_45min_MgCl2	12	25mer 601 array plasmid, E. coli genome SGD	0.903	0.994	0.962	0.927	31.4
WT3_GpC_2U_90min	12	25mer 601 array plasmid, E. coli genome SGD	0.62	0.979	0.333	0.633	40.6
WT4_xl_CpG_2U_150min_refill_at_90min_MgCl2	12	25mer 601 array plasmid, E. coli genome SGD	0.916	0.974	0.736	0.842	31.2
WT4_xl_CpG_2U_15min	13	25mer 601 array plasmid, E. coli genome SGD	0.92	0.974	0.414	0.686	54
WT4_xl_CpG_2U_240min_refill_at_180min	13	25mer 601 array plasmid, E. coli genome SGD	0.752	0.922	0.111	0.493	89.4
WT4_xl_CpG_2U_45min	13	25mer 601 array plasmid, E. coli genome SGD	0.846	0.961	0.155	0.577	46.4
WT4_xl_CpG_2U_45min_MgCl2	12	25mer 601 array plasmid, E. coli genome SGD	0.944	0.994	0.983	0.988	31.6
WT4_xl_CpG_1U_45min_MgCl2	12	25mer 601 array plasmid, E. coli genome SGD	0.963	0.992	0.988	0.989	41.1
WT4_xl_CpG_2U_90min	13	25mer 601 array plasmid, E. coli genome SGD	0.818	0.973	0.131	0.565	43
WT4_xl_GpC_2U_150min_refill_at_90min_MgCl2	12	25mer 601 array plasmid, E. coli genome SGD	0.94	0.987	0.663	0.582	26.1
WT4_xl_GpC_2U_15min	13	25mer 601 array plasmid, E. coli genome SGD	0.983	0.995	0.874	0.899	64.8
WT4_xl_GpC_2U_240min_refill_at_180min	13	25mer 601 array plasmid, E. coli genome SGD	0.874	0.987	0.181	0.614	31.5
WT4_xl_GpC_2U_45min	13	25mer 601 array plasmid, E. coli genome SGD	0.955	0.991	0.576	0.722	26.4
WT4_xl_GpC_2U_45min_MgCl2	14	25mer 601 array plasmid, E. coli genome SGD	0.966	0.992	0.901	0.805	20.4
WT4_xl_GpC_1U_45min_MgCl2	12	25mer 601 array plasmid, E. coli genome SGD	0.979	0.994	0.953	0.904	35.8
WT4_xl_GpC_2U_90min	13	25mer 601 array plasmid, E. coli genome SGD	0.933	0.99	0.401	0.677	28.8
WT4_CpG_2U_15min	13	25mer 601 array plasmid, E. coli genome SGD	0.808	0.976	0.409	0.683	30.3
WT4_CpG_2U_240min_refill_at_180min	13	25mer 601 array plasmid, E. coli genome SGD	0.385	0.914	0.137	0.529	91.2
WT4_CpG_2U_45min	13	25mer 601 array plasmid, E. coli genome SGD	0.673	0.975	0.201	0.625	83.9
WT4_CpG_2U_90min	13	25mer 601 array plasmid, E. coli genome SGD	0.622	0.971	0.17	0.605	59.8
WT4_GpC_2U_15min	13	25mer 601 array plasmid, E. coli genome SGD	0.877	0.994	0.797	0.88	61.1
WT4_GpC_2U_240min_refill_at_180min	13	25mer 601 array plasmid, E. coli genome SGD	0.391	0.985	0.182	0.651	37
WT4_GpC_2U_45min	13	25mer 601 array plasmid, E. coli genome SGD	0.686	0.989	0.319	0.72	78.7
WT4_GpC_2U_90min	13	25mer 601 array plasmid, E. coli genome SGD	0.609	0.989	0.203	0.691	32
WT5_xl_1_CpG_2U_180min_refill_at_90min	14	25mer 601 array plasmid	0.772	0.896	0.0733	0.304	86
WT5_xl_1_CpG_2U_90min	14	25mer 601 array plasmid	0.828	0.893	0.0716	0.302	71.7
WT5_xl_1_GpC_4U_180min_refill_at_90min	14	25mer 601 array plasmid	0.831	0.964	0.054	0.376	78.1
WT5_xl_1_GpC_4U_90min	14	25mer 601 array plasmid	0.866	0.961	0.0535	0.375	77.5
WT5_xl_20_CpG_2U_180min_refill_at_90min	14	25mer 601 array plasmid	0.779	0.896	0.0643	0.297	63.7
WT5_xl_20_CpG_2U_180min_EM-seq_refill_at_90min	8	25mer 601 array plasmid	0.782	0.909	0.0496	0.308	49.3
WT5_xl_20_CpG_2U_90min	14	25mer 601 array plasmid	0.837	0.902	0.0657	0.308	76.5
WT5_xl_20_GpC_4U_180min_refill_at_90min	14	25mer 601 array plasmid	0.841	0.964	0.0482	0.368	70.3
WT5_xl_20_GpC_4U_180min_EM-seq_refill_at_90min	8	25mer 601 array plasmid	0.877	0.979	0.0481	0.485	37.4
WT5_xl_20_GpC_4U_90min	14	25mer 601 array plasmid	0.878	0.967	0.0457	0.38	66.8
WT5_xl_5_CpG_2U_180min_refill_at_90min	14	25mer 601 array plasmid	0.78	0.883	0.0688	0.289	45.5
WT5_xl_5_CpG_2U_180min_EM-seq_refill_at_90min	8	25mer 601 array plasmid	0.782	0.902	0.0558	0.311	53.5
WT5_xl_5_CpG_2U_90min	14	25mer 601 array plasmid	0.833	0.91	0.0595	0.315	77.1
WT5_xl_5_GpC_4U_180min_refill_at_90min	14	25mer 601 array plasmid	0.828	0.966	0.0474	0.371	70.8
WT5_xl_5_GpC_4U_180min_EM-seq_refill_at_90min	8	25mer 601 array plasmid	0.867	0.979	0.0522	0.487	58.7
WT5_xl_5_GpC_4U_90min	14	25mer 601 array plasmid	0.864	0.964	0.0477	0.373	72.6
in_vitro_chromatin_low_dens_CpG_40000U_120min_refill_at_60min_MgCl2	12		0.363				40.9
in_vitro_chromatin_low_dens_CpG_40000U_30min_MgCl2	12		0.377				31
in_vitro_chromatin_low_dens_CpG_10000U_30min_MgCl2	12		0.386				33.2
in_vitro_chromatin_low_dens_GpC_40000U_120min_refill_at_60min_MgCl2	12		0.398				27
in_vitro_chromatin_low_dens_GpC_40000U_30min_MgCl2	12		0.421				32.1
in_vitro_chromatin_low_dens_GpC_10000U_30min_MgCl2	12		0.434				25.3
in_vitro_chromatin_high_dens_CpG_40000U_120min_refill_at_60min_MgCl2	12		0.663				39
in_vitro_chromatin_high_dens_CpG_40000U_30min_MgCl2	12		0.675				42.3
in_vitro_chromatin_high_dens_CpG_10000U_30min_MgCl2	12		0.685				46.9
in_vitro_chromatin_high_dens_GpC_40000U_120min_refill_at_60min_MgCl2	12		0.747				25.5
in_vitro_chromatin_high_dens_GpC_40000U_30min_MgCl2	12		0.758				22.9
in_vitro_chromatin_high_dens_GpC_10000U_30min_MgCl2	12		0.772				26.1
